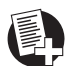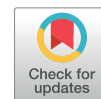

# Is Being Physically Active Enough to Be Metabolically Healthy? The Key Role of Sedentary Behavior

*Diabetes Care* 2021;44:17–19 | <https://doi.org/10.2337/dci20-0064>

Mary O. Whipple,<sup>1,2,3</sup>  
Judith G. Regensteiner,<sup>2,3</sup> and  
Audrey Bergouignan<sup>4,5</sup>

Low levels of physical activity (PA) are now well recognized as a major public health problem, implicated in cancer, cardiovascular disease (CVD), metabolic syndrome, diabetes, and early mortality (1). PA guidelines (i.e.,  $\geq 150$  min/week of moderate activity or  $\geq 75$  min/week of vigorous activity, collectively referred to as moderate to vigorous physical activity [MVPA]) are globally promoted to protect the population against the risk of developing chronic disease. But is this sufficient to promote metabolic health? The relationship between PA and health appears to be more complex than initially thought, and another component has been attracting attention over the past decade: sedentary behavior (SB). Although they are often used interchangeably, SB is fundamentally different from physical inactivity. While physical inactivity is defined as engaging in less PA than necessary to meet the current guidelines (2), SB describes “any waking behavior characterized by an energy expenditure  $\leq 1.5$  metabolic equivalents (METs) while in a sitting or reclining posture” (3). Thus, individuals can be both physically active and highly sedentary (4,5). Increased time spent sitting raises the risk for metabolic syndrome (6), incident CVD, CVD-related risk factors,

and early mortality (7,8), even in people who exercise regularly. These observations raise obvious questions: Are the effects of SB independent from those of PA or simply the “other side of the coin”? What is the minimum level of MVPA needed to counteract the adverse health effects of SB?

A recent harmonized meta-analysis of data from more than 1 million adults showed that high levels of PA (i.e., about 60–75 min/day of MVPA) are needed to eliminate the effect of 9 h/day of SB on mortality (9). Even if this exceeds the current PA recommendations, this observation suggests that once we reach such levels, we should be free of the effects of SB on health. In this issue of *Diabetes Care*, Madden et al. report that SB adversely influences metabolic health even in the presence of large volumes of MVPA (10). In this study, the relationship between objectively measured SB, light physical activity (LPA), MVPA, and metabolic syndrome risk score was examined in 54 older adults. Notably, study participants had remarkably high levels of MVPA (2.6 h/day), 2 h more than the current recommendations (2) and more than seven times that of typical older adults (11). The authors found that greater sedentary time was associated

with higher metabolic risk score, independent of age and sex. They conclude that even among highly active older adults, SB is associated with increased metabolic risk (Fig. 1). Thus, MVPA and SB appear to be independent predictors of metabolic risk, as the negative health effects of SB are not fully offset by even extremely high levels of MVPA.

This study adds to SB literature in several meaningful ways. Even in a population of Masters athletes reaching “ceiling levels” of PA who have likely been active most of their lives, SB is not only highly prevalent but also similar to sedentary levels of inactive older adults (11). Furthermore, SB is still strongly associated with metabolic risk. This highlights the importance of understanding and potentially intervening on both physical inactivity (too little exercise) and high levels of SB (too much sitting). This study is clinically important given that SB has been recognized as a major risk factor for many metabolic diseases (12). Studying a highly physically active group of older adults lays the groundwork for delineating the independent role of SB in the relationship between PA and health, as sitting too much may have different health implications than lack of MVPA.

<sup>1</sup>Division of Geriatric Medicine, Department of Medicine, University of Colorado Anschutz Medical Campus, Aurora, CO

<sup>2</sup>Division of General Internal Medicine, Department of Medicine, University of Colorado Anschutz Medical Campus, Aurora, CO

<sup>3</sup>Center for Women's Health Research, Department of Medicine, University of Colorado Anschutz Medical Campus, Aurora, CO

<sup>4</sup>Division of Endocrinology, Metabolism, and Diabetes, Department of Medicine, University of Colorado Anschutz Medical Campus, Aurora, CO

<sup>5</sup>Université de Strasbourg, CNRS, IPHC UMR 7178, Strasbourg, France

Corresponding author: Audrey Bergouignan, [audrey.bergouignan@iphc.cnrs.fr](mailto:audrey.bergouignan@iphc.cnrs.fr)

© 2020 by the American Diabetes Association. Readers may use this article as long as the work is properly cited, the use is educational and not for profit, and the work is not altered. More information is available at <https://www.diabetesjournals.org/content/license>.

See accompanying article, p. 194.

The study by Madden et al. (10) has numerous strengths. First, studying the role of SB in a highly active group of people is an innovative approach to unraveling the importance (and unique contribution) of SB versus MVPA. Additionally, the focus on older adults is critical, as older adults tend to be highly sedentary (13) and are especially vulnerable to the negative effects of SB due to the high burden of cardiometabolic risk factors (14,15). Second, the use of an objective measure of SB is a significant strength, as self-report typically results in underestimation of SB (16). The use of a compositional analysis should also be commended, as it accounts for the co-dependence of time in different activity types and is one of the most robust choices for analyzing these types of data (17). Third, the use of a continuous score for metabolic risk, as opposed to dichotomous presence/absence of metabolic syndrome is important, as it enables evaluation of the association between SB and metabolic risk in healthier individuals, rather than simply identifying these associations once an individual reaches the threshold of a diagnosis of metabolic disease. Finally, the study included both sexes, which is

important for our understanding of potential sex differences in relationships between SB, PA, and health (18).

There are also a few limitations to this study. First, as the authors acknowledge, the study utilized a SenseWear armband, which has been shown to be inaccurate at high-intensity activity levels (19,20). Additionally, an upper-arm monitor is not as accurate as a posture monitor (e.g., activPAL mounted on the thigh) for classification of SB. Second, it is unclear how the increased metabolic risk score may translate into CVD in this population, although the authors do indicate that the mean difference noted between their high and low groups was associated with approximately 1.5-fold risk of cardiovascular events in the Multi-Ethnic Study of Atherosclerosis (MESA) cohort (21). Understanding if/how these differences in metabolic risk score lead to future metabolic disease and CVD, as well as how the metabolic risk of the subjects studied by Madden et al. compares to that of inactive older adults, is essential. Third, this study is cross-sectional, and future longitudinal and intervention research will need to investigate the impact of differences and/or changes in SB on metabolic risk.

Critically, we must determine what strategies or combination of strategies are effective in reducing SB through an increase in both MVPA and LPA. LPA, which includes everyday activities such as walking, housework, or taking the stairs (activities requiring 1.5–2.9 METs), is tightly related to time spent in SB, as one typically offsets the other. The literature on SB, LPA, and MVPA to date indicates that we must target and act on each in order to improve metabolic health (22). This is particularly important since efforts targeting an increase in MVPA among sedentary adults can inadvertently lead to behavioral compensation, in which an individual decreases their LPA and increases their SB in response to exercise (23,24). Additionally, the study by Madden et al. does not address the minimum amount of MVPA needed to offset the effects of SB. Even though these participants were highly active, this level of MVPA was not sufficient to offset the effects of spending an average of 9.4 sedentary hours per day among healthy older adults, unlike what was observed in the meta-analysis by Ekelund et al. (9). Finally, further work is needed to understand the biological differences between physical inactivity

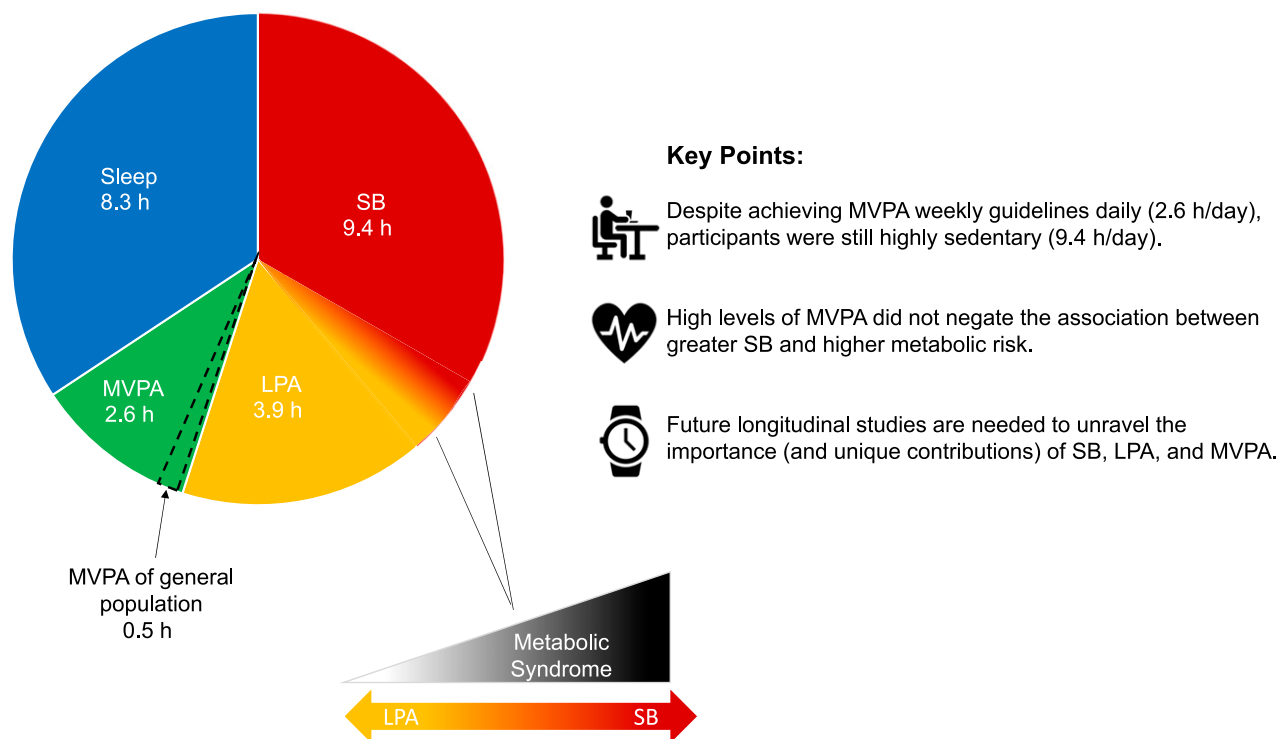

**Figure 1**—Diagram of study participant activity (10), with the dashed slice denoting much lower, typical MVPA levels. SB and LPA are tightly correlated and are related to risk of developing metabolic syndrome, with high SB and low LPA associated with greatest risk.

and SB. By better delineating the complex interrelationships between SB, LPA, and MVPA as well as the potential mechanisms linking SB to cardiometabolic risk (25), we can move toward more comprehensive public health guidelines that discuss SB recommendations for specific populations and specific exercise modalities that would be most beneficial.

**Funding.** This publication was made possible by funding to M.O.W. from the National Institutes of Health (NIH) National Institute on Aging (T32AG000279), by funding to A.B. from the NIH National Institute of Diabetes and Digestive and Kidney Diseases (R00DK100465, principal investigator A.B.) and the Colorado National Obesity Research Center (P30DK048520), and by funding to M.O.W. and J.G.R. from the Center for Women's Health Research.

The content is solely the responsibility of the authors and does not necessarily represent the official views of the funding agencies.

**Duality of Interest.** No potential conflicts of interest relevant to this article were reported.

## References

- Lee I-M, Shiroma EJ, Lobelo F, Puska P, Blair SN, Katzmarzyk PT. Impact of physical inactivity on the world's major non-communicable diseases. *Lancet* 2012;380:219–229
- Piercy KL, Troiano RP, Ballard RM, et al. The Physical Activity Guidelines for Americans. *JAMA* 2018;320:2020–2028
- Tremblay MS, Aubert S, Barnes JD, et al.; SBRN Terminology Consensus Project Participants. Sedentary Behavior Research Network (SBRN) – Terminology Consensus Project process and outcome. *Int J Behav Nutr Phys Act* 2017;14:75
- Tremblay MS, Colley RC, Saunders TJ, Healy GN, Owen N. Physiological and health implications of a sedentary lifestyle. *Appl Physiol Nutr Metab* 2010;35:725–740
- Bouchard C, Blair SN, Katzmarzyk PT. Less sitting, more physical activity, or higher fitness? *Mayo Clin Proc* 2015;90:1533–1540
- Edwardson CL, Gorely T, Davies MJ, et al. Association of sedentary behaviour with metabolic syndrome: a meta-analysis. *PLoS One* 2012;7:3–7
- Biswas A, Oh PI, Faulkner GE, et al. Sedentary time and its association with risk for disease incidence, mortality, and hospitalization in adults: a systematic review and meta-analysis. *Ann Intern Med* 2015;162:123–132
- Wilmot EG, Edwardson CL, Achana FA, et al. Sedentary time in adults and the association with diabetes, cardiovascular disease and death: systematic review and meta-analysis. *Diabetologia* 2012;55:2895–2905
- Ekelund U, Steene-Johannessen J, Brown WJ, et al.; Lancet Physical Activity Series 2 Executive Committee; Lancet Sedentary Behaviour Working Group. Does physical activity attenuate, or even eliminate, the detrimental association of sitting time with mortality? A harmonised meta-analysis of data from more than 1 million men and women. *Lancet* 2016;388:1302–1310
- Madden KM, Feldman B, Chase J. Sedentary time and metabolic risk in extremely active older adults. *Diabetes Care* 2021;44:194–200
- Giné-Garriga M, Sansano-Nadal O, Tully MA, et al.; SITLESS Group. Accelerometer-measured sedentary and physical activity time and their correlates in European older adults: the SITLESS study. *J Gerontol A Biol Sci Med Sci* 2020;75:1754–1762
- Stamatakis E, Hamer M, Dunstan DW. Screen-based entertainment time, all-cause mortality, and cardiovascular events: population-based study with ongoing mortality and hospital events follow-up. *J Am Coll Cardiol* 2011;57:292–299
- Gennuso KP, Thraen-Borowski KM, Gangnon RE, Colbert LH. Patterns of sedentary behavior and physical function in older adults. *Aging Clin Exp Res* 2016;28:943–950
- Schneider KM, O'Donnell BE, Dean D. Prevalence of multiple chronic conditions in the United States' Medicare population. *Health Qual Life Outcomes* 2009;7:82
- Roth GA, Johnson CO, Abate KH, et al. The burden of cardiovascular diseases among us states, 1990–2016. *JAMA Cardiol* 2018;3:375–389
- Matthews CE, Moore SC, George SM, Sampson J, Bowles HR. Improving self-reports of active and sedentary behaviors in large epidemiologic studies. *Exerc Sport Sci Rev* 2012;40:118–126
- Chastin SFM, Palarea-Albaladejo J, Dontje ML, Skelton DA. Combined effects of time spent in physical activity, sedentary behaviors and sleep on obesity and cardio-metabolic health markers: a novel compositional data analysis approach. *PLoS One* 2015;10:e0139984
- Reusch JEB, Rajendra Kumar T, Regensteiner JG, Zeitler PS; Conference Participants. Identifying the critical gaps in research on sex differences in metabolism across the life span. *Endocrinology* 2018;159:9–19
- van Hoya K, Mortelmans P, Lefevre J. Validation of the SenseWear Pro3 armband using an incremental exercise test. *J Strength Cond Res* 2014;28:2806–2814
- Powell C, Carson BP, Dowd KP, Donnelly AE. The accuracy of the SenseWear Pro3 and the activPAL3 Micro devices for measurement of energy expenditure. *Physiol Meas* 2016;37:1715–1727
- Agarwal S, Jacobs DR, Vaidya D, et al. Metabolic syndrome derived from principal component analysis and incident cardiovascular events: the Multi Ethnic Study of Atherosclerosis (MESA) and Health, Aging, and Body Composition (Health ABC). *Cardiol Res Pract* 2012;2012:919425
- Bessesen DH, Bergouignan A. Chapter 14: Behavior change strategies for increasing exercise and decreasing sedentary behaviors in diabetes. In *Diabetes and Exercise: From Pathophysiology to Clinical Implementation*. 2nd ed. Reusch JEB, Regensteiner JG, Stewart KJ, Veves A, Eds. Humana Press, 2018
- King NA, Caudwell P, Hopkins M, et al. Metabolic and behavioral compensatory responses to exercise interventions: barriers to weight loss. *Obesity (Silver Spring)* 2007;15:1373–1383
- Lefai E, Blanc S, Momken I, et al. Exercise training improves fat metabolism independent of total energy expenditure in sedentary overweight men, but does not restore lean metabolic phenotype. *Int J Obes* 2017;41:1728–1736
- Dempsey PC, Matthews CE, Dashti SG, et al. Sedentary behavior and chronic disease: mechanisms and future directions. *J Phys Act Health* 2020;17:52–61
